# Supplementary material for: Potential for future reductions of global GHG and air pollutants from circular waste management systems
Source: PubMed Central journal article supplement (PMC8748894; doi:10.1038/s41467-021-27624-7), 2022-01-10
Supplement: 41467_2021_27624_MOESM1_ESM.pdf [file 41467_2021_27624_MOESM1_ESM.pdf]

Supplementary Information to :

## Potentials for future reductions of global GHG and air pollutants from circular waste management systems

Adriana Gómez-Sanabria <sup>1,2\*</sup>, Gregor Kiesewetter<sup>1</sup>, Zbigniew Klimont<sup>1</sup>, Wolfgang Schoepp<sup>1</sup> & Helmut Haberl<sup>2</sup>

<sup>1</sup> Pollution Management Research Group, Energy, Climate and Environment Program, International Institute for Applied Systems Analysis, Laxenburg, Austria

<sup>2</sup> Institute of Social Ecology, University of Natural Resources and Life Sciences, Vienna, Austria

### Corresponding author

Correspondence to: Adriana Gómez-Sanabria. Email: gomezsa@iiasa.ac.at

### Contents

|                                                                                                     |    |
|-----------------------------------------------------------------------------------------------------|----|
| S1. Waste generation in urban and rural areas by region.....                                        | 2  |
| S2. Scenario Analysis. ....                                                                         | 5  |
| S3. Comparison of emissions from MSW .....                                                          | 8  |
| S4. Description of the SSPS.....                                                                    | 10 |
| S5. Abbreviations.....                                                                              | 12 |
| S6. GDP per capita and share of urban population. ....                                              | 13 |
| S7. Description of the methodology to project municipal solid waste generation and composition. ... | 15 |
| S8. Rural-urban waste generation ratio.....                                                         | 21 |
| S9. Waste matrix in GAINS.....                                                                      | 22 |
| S10. MSW management narratives and regional aggregation. ....                                       | 22 |

## S1. Waste generation in urban and rural areas by region

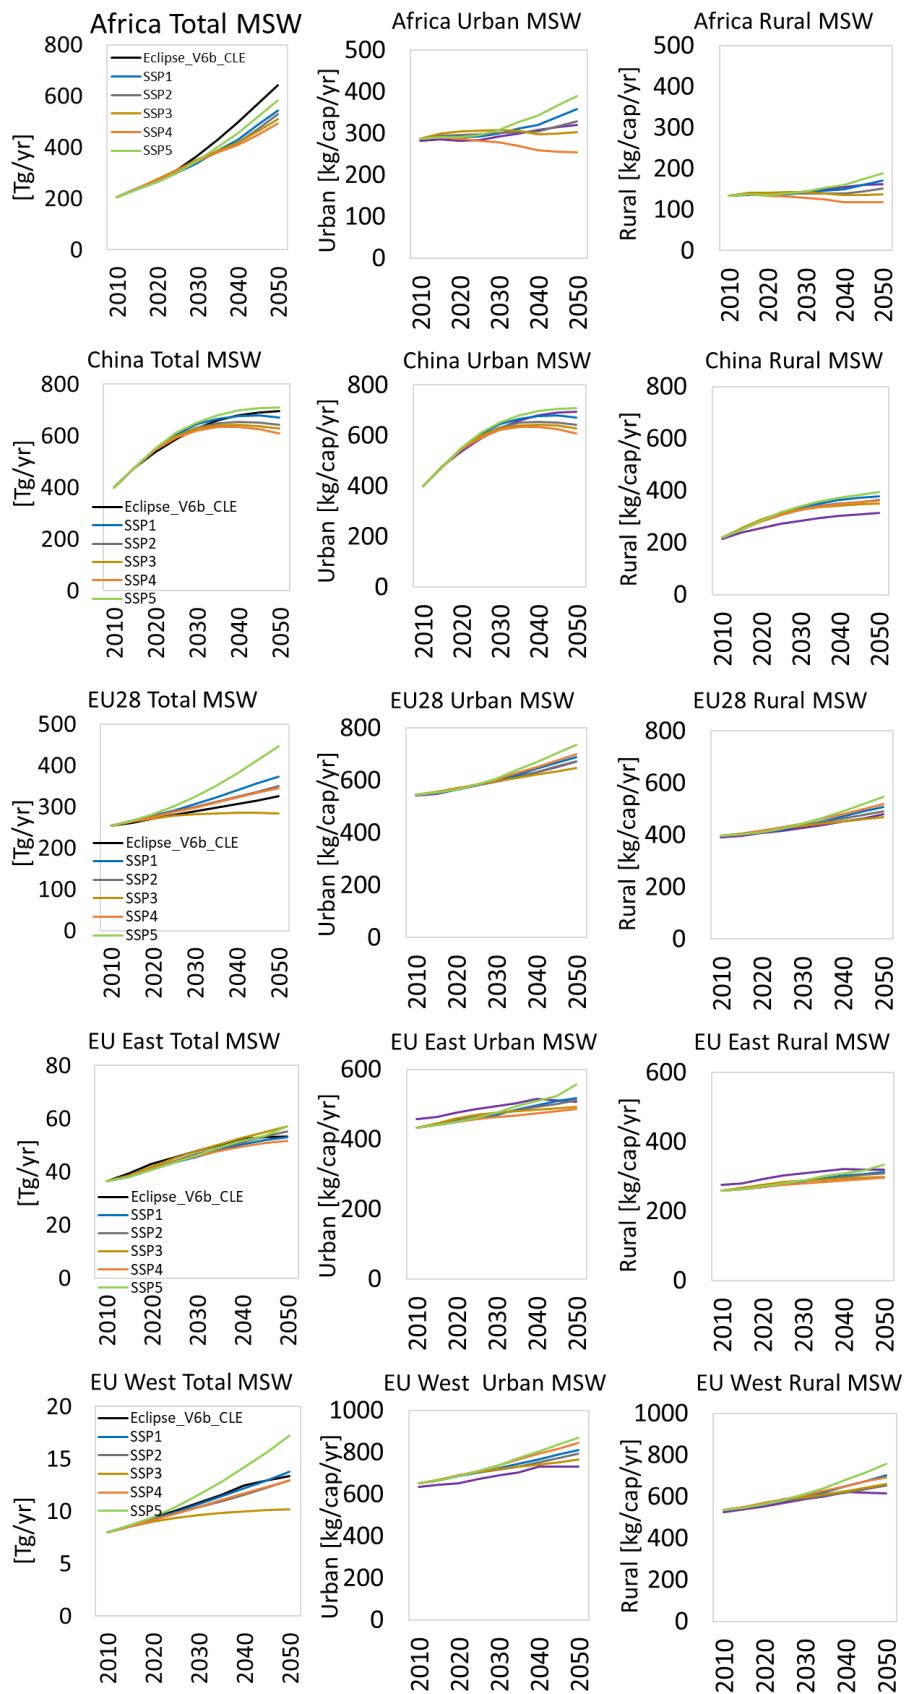

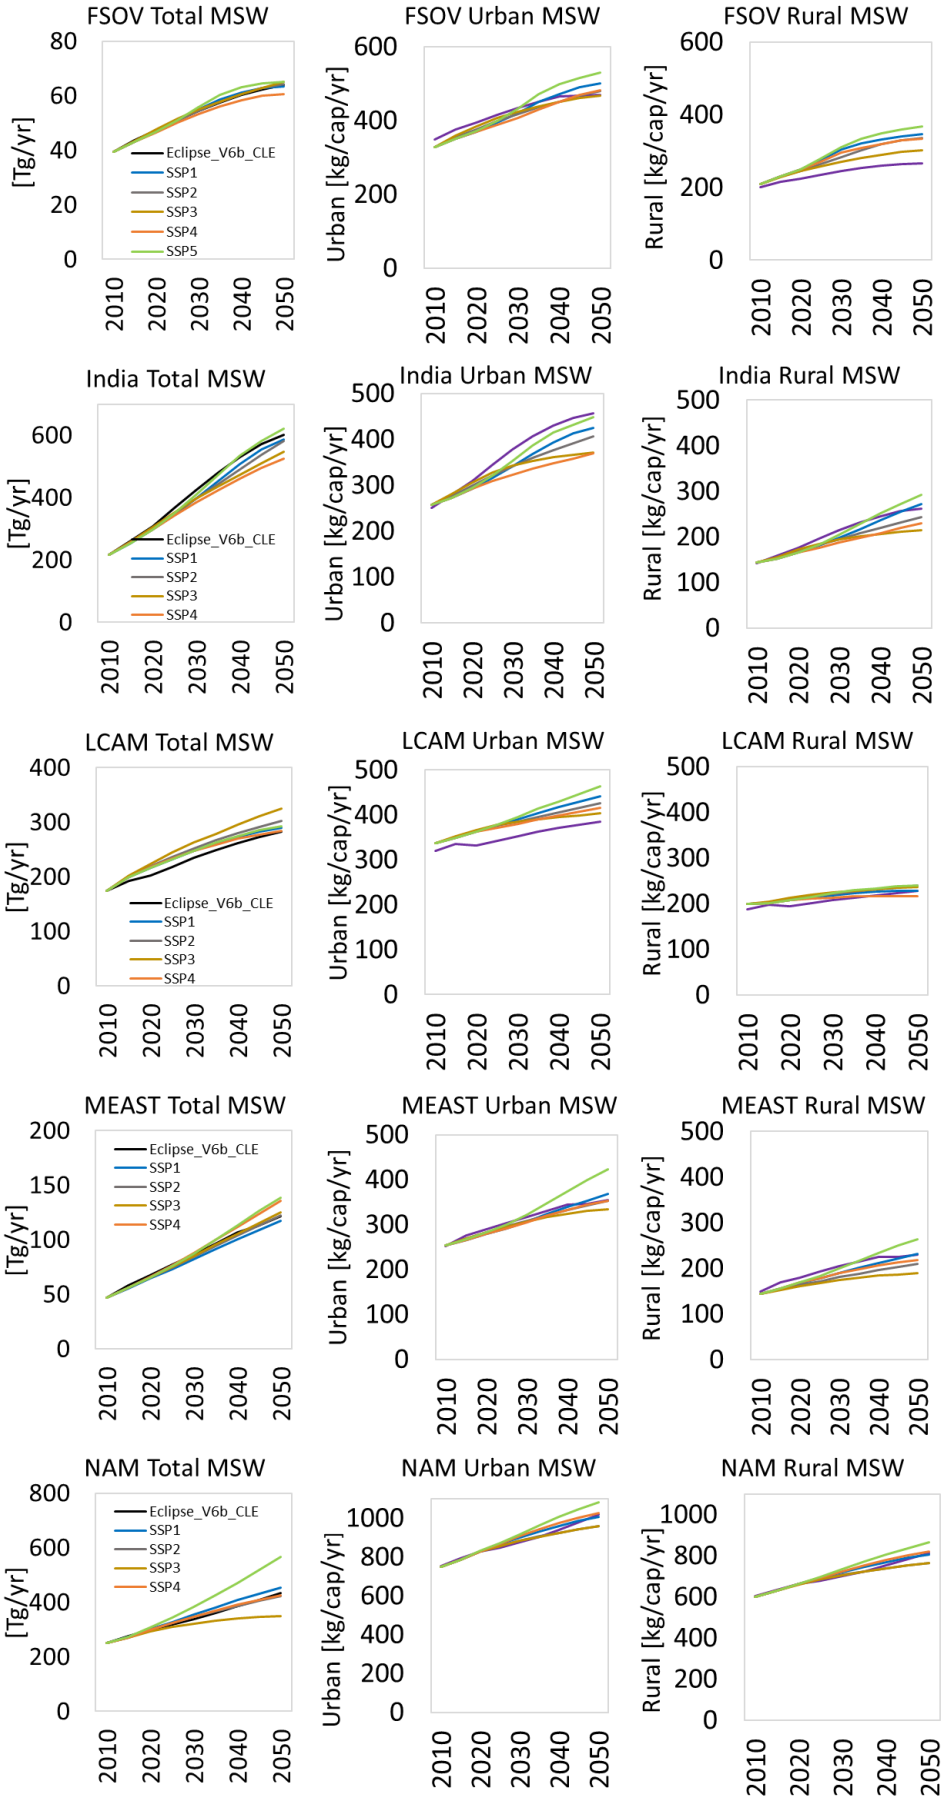

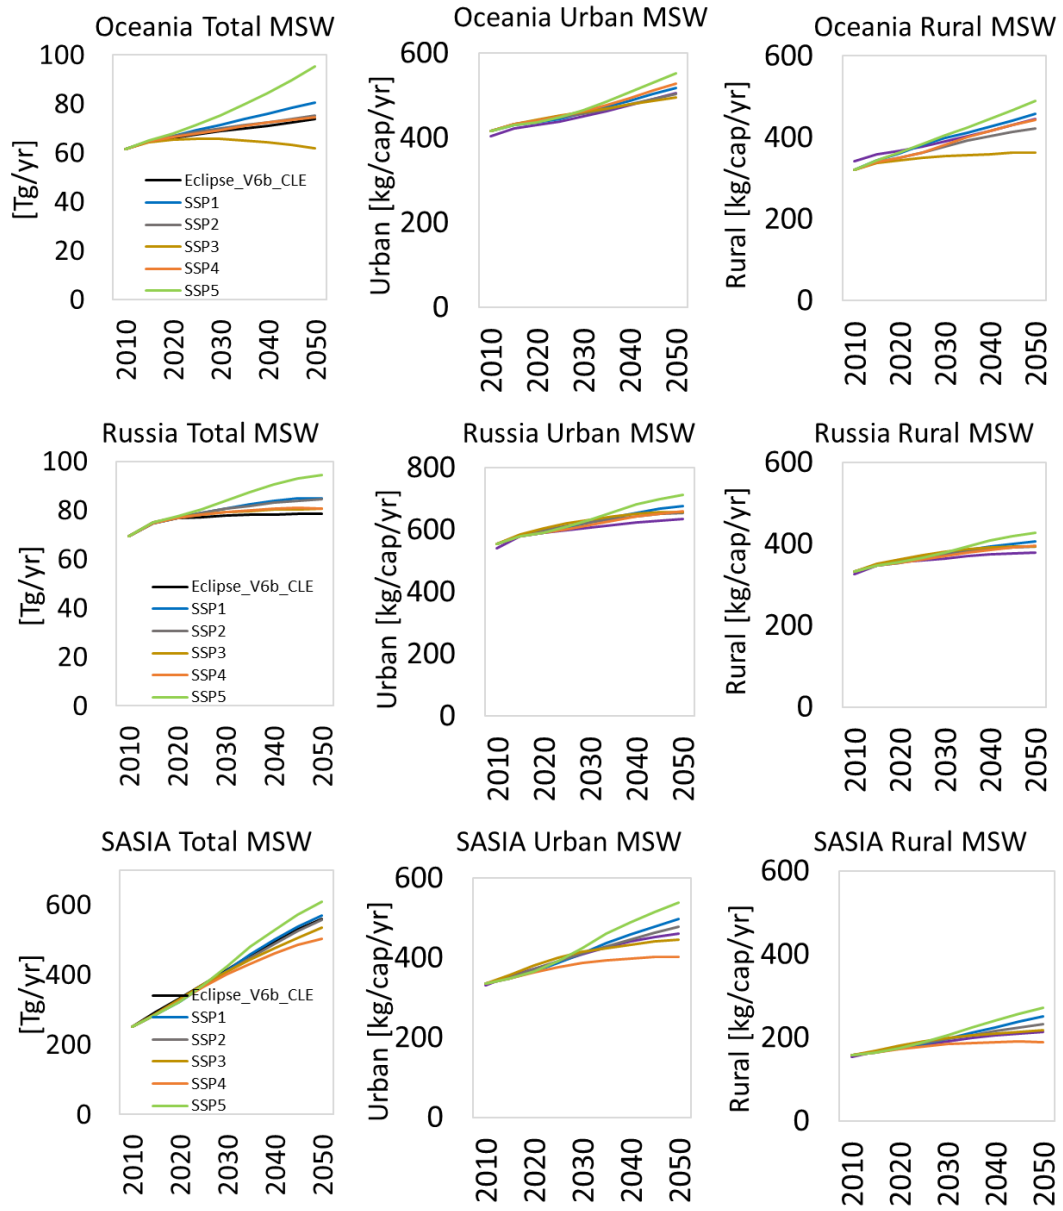

Fig. S1. MSW generation in urban and rural areas by region – scenario

## S2. Scenario Analysis.

The following section presents an analysis of the mitigation scenarios along with regional figures. Furthermore, Table S1 presents a summary of MSW generation, management, and related emissions for 2030 and 2050.

Table S1. Global estimations of MSW, CH4, particulate matter and air pollutants for the baseline scenarios (CLE) and the mitigation scenarios (MFR).

|                                           | SSP1     |        |        |          |        |        | SSP2            |        |        |                 |        |        |
|-------------------------------------------|----------|--------|--------|----------|--------|--------|-----------------|--------|--------|-----------------|--------|--------|
|                                           | SSP1_CLE |        |        | SSP1_MFR |        |        | SSP2_CLE        |        |        | SSP2_MFR        |        |        |
|                                           | 2030     | 2040   | 2050   | 2030     | 2040   | 2050   | 2030            | 2040   | 2050   | 2030            | 2040   | 2050   |
| MSW generation (Tg)                       | 3048     | 3517   | 3901   | 2421     | 2771   | 3059   | 3025            | 3423   | 3801   | 3025            | 3423   | 3801   |
| MSW dumpsites/non-sanitary landfills (Tg) | 1011     | 1180   | 1327   | 88       | 0      | 0      | 965             | 1099   | 1239   | 534             | 131    | 0      |
| MSW openly burned (Tg)                    | 566      | 680    | 779    | 21       | 0      | 0      | 568             | 666    | 767    | 289             | 46     | 0      |
| CH4 (Gg)                                  | 36991    | 45861  | 53692  | 32335    | 17531  | 6706   | 36633           | 44966  | 51862  | 38212           | 39509  | 22559  |
| CO (Gg)                                   | 14352    | 16112  | 17406  | 574      | 12     | 14     | 14937           | 16657  | 18206  | 7794            | 1184   | 17     |
| CO2 (Gg)                                  | 200145   | 235671 | 267753 | 91708    | 175940 | 198494 | 201819          | 230096 | 259303 | 145314          | 164740 | 313547 |
| NOX (Gg)                                  | 557      | 654    | 735    | 151      | 189    | 213    | 565             | 648    | 730    | 337             | 214    | 257    |
| PM_2_5 (Gg)                               | 3012     | 3387   | 3665   | 118      | 1      | 1      | 3133            | 3497   | 3828   | 1629            | 245    | 1      |
| PM_BC (Gg)                                | 227      | 256    | 277    | 9        | 0      | 0      | 236             | 264    | 289    | 123             | 19     | 0      |
| PM_OC (Gg)                                | 1795     | 2014   | 2175   | 71       | 0      | 0      | 1869            | 2083   | 2276   | 975             | 147    | 0      |
| SO2 (Gg)                                  | 110      | 129    | 145    | 16       | 18     | 21     | 111             | 128    | 144    | 60              | 25     | 25     |
| VOC (Gg)                                  | 2886     | 3239   | 3498   | 115      | 2      | 2      | 3004            | 3349   | 3660   | 1568            | 238    | 3      |
|                                           | SSP3     |        |        |          |        |        | SSP4            |        |        |                 |        |        |
|                                           | SSP3_CLE |        |        | SSP3_MFR |        |        | SSP4_CLE        |        |        | SSP4_MFR        |        |        |
|                                           | 2030     | 2040   | 2050   | 2030     | 2040   | 2050   | 2030            | 2040   | 2050   | 2030            | 2040   | 2050   |
| MSW generation (Tg)                       | 2994     | 3302   | 3579   | 2994     | 3302   | 3579   | 2990            | 3330   | 3602   | 2990            | 3330   | 3602   |
| MSW dumpsites/non-sanitary landfills (Tg) | 917      | 1010   | 1110   | 533      | 139    | 0      | 994             | 1123   | 1235   | 554             | 152    | 0      |
| MSW openly burned (Tg)                    | 576      | 659    | 742    | 391      | 97     | 0      | 554             | 633    | 706    | 348             | 79     | 0      |
| CH4 (Gg)                                  | 36192    | 43804  | 49434  | 37441    | 38763  | 23696  | 37050           | 45656  | 52404  | 38309           | 38352  | 22791  |
| CO (Gg)                                   | 15808    | 17617  | 19251  | 12035    | 3200   | 16     | 14004           | 15028  | 15767  | 9840            | 2391   | 16     |
| CO2 (Gg)                                  | 203234   | 223929 | 242499 | 164259   | 172697 | 290713 | 193053          | 213202 | 229575 | 153296          | 170134 | 283600 |
| NOX (Gg)                                  | 576      | 647    | 712    | 433      | 251    | 238    | 543             | 605    | 656    | 388             | 234    | 233    |
| PM_2_5 (Gg)                               | 3313     | 3694   | 4039   | 2513     | 665    | 1      | 2939            | 3158   | 3317   | 2056            | 497    | 1      |
| PM_BC (Gg)                                | 249      | 278    | 304    | 189      | 50     | 0      | 222             | 238    | 251    | 155             | 37     | 0      |
| PM_OC (Gg)                                | 1978     | 2205   | 2409   | 1507     | 400    | 0      | 1752            | 1879   | 1971   | 1232            | 298    | 0      |
| SO2 (Gg)                                  | 114      | 129    | 143    | 82       | 34     | 23     | 107             | 119    | 129    | 71              | 30     | 23     |
| VOC (Gg)                                  | 3179     | 3543   | 3871   | 2422     | 644    | 3      | 2816            | 3021   | 3169   | 1980            | 481    | 3      |
|                                           | SSP5     |        |        |          |        |        | ECLIPSE_V6b     |        |        |                 |        |        |
|                                           | SSP5_CLE |        |        | SSP5_MFR |        |        | ECLIPSE_V6b_CLE |        |        | ECLIPSE_V6b_MFR |        |        |
|                                           | 2030     | 2040   | 2050   | 2030     | 2040   | 2050   | 2030            | 2040   | 2050   | 2030            | 2040   | 2050   |
| MSW generation (Tg)                       | 3144     | 3758   | 4296   | 3144     | 3758   | 4296   | 3043            | 3536   | 3948   | 3043            | 3536   | 3948   |
| MSW dumpsites/non-sanitary landfills (Tg) | 1032     | 1234   | 1414   | 160      | 0      | 0      | 964             | 1129   | 1282   | 149             | 0      | 0      |
| MSW openly burned (Tg)                    | 579      | 717    | 832    | 43       | 0      | 0      | 576             | 704    | 811    | 38              | 0      | 0      |
| CH4 (Gg)                                  | 37100    | 46520  | 55618  | 37003    | 23834  | 11064  | 36557           | 44634  | 52040  | 36443           | 23051  | 10881  |
| CO (Gg)                                   | 14667    | 16946  | 18621  | 1151     | 18     | 21     | 15255           | 17640  | 19225  | 1092            | 16     | 18     |
| CO2 (Gg)                                  | 209869   | 260156 | 308042 | 139975   | 317820 | 374100 | 201914          | 238015 | 268572 | 130963          | 286463 | 321425 |
| NOX (Gg)                                  | 574      | 699    | 804    | 191      | 260    | 305    | 571             | 680    | 765    | 182             | 236    | 264    |
| PM_2_5 (Gg)                               | 3079     | 3563   | 3922   | 239      | 1      | 1      | 3199            | 3704   | 4041   | 226             | 1      | 1      |
| PM_BC (Gg)                                | 232      | 269    | 296    | 19       | 0      | 0      | 241             | 279    | 305    | 18              | 0      | 0      |
| PM_OC (Gg)                                | 1834     | 2118   | 2327   | 143      | 0      | 0      | 1909            | 2207   | 2404   | 135             | 0      | 0      |
| SO2 (Gg)                                  | 113      | 137    | 157    | 22       | 25     | 30     | 113             | 135    | 152    | 21              | 23     | 26     |
| VOC (Gg)                                  | 2949     | 3406   | 3741   | 231      | 3      | 3      | 3068            | 3547   | 3865   | 219             | 3      | 3      |

SSP1\_MFR: The global adoption of the measure targeting the reduction of urban municipal food and plastic waste of 50% by 2030 reduces the global MSW generation by about 20% compared to the baseline (SSP1\_CLE). Compared to SSP1\_CLE, regions as Africa, China, SASIA, LCAM will experience a constant reduction of 30% per year on MSW generation between 2030 and 2050. India is expected to reduce MSW generation by 15% in 2030, reaching a maximum reduction of 18% in 2050.

The rest of the world is expected to have a steady reduction of about 18% per year until 2050. Collection rates in developing regions will reach the levels of the EU in both, urban and rural areas achieving rates of  $\geq 95\%$  already in 2030. The reduction of MSW couple with the implementation of MSW management policies at a global level as a consequence of technology transfer and capacity building in less favored countries, including rural areas, will result in a global reduction of MSW openly burned of 96% in 2030 and close to 100% in 2050. Consequently, same reduction percentage of particulate matter and air pollutants emissions will be observed. This reduction in emissions will have a notorious positive impact on air quality and can potentially bring some climate benefits<sup>1-3</sup>. Thus, it will be possible to avoid the release of 218 Gg/yr BC in 2030 and 277 Gg/yr BC in 2050. The speedy implementation of anaerobic digestion to treat organic waste and the establishment of source separated MSW collection to increase the recycling of materials achieves MSW landfill/dumpsite reduction of 92% in 2030 and 97% in 2050 compared to the same years in the SSP1\_CLE. The uniform improvement of MSW management systems at a global level reduces CH<sub>4</sub> emissions by 13% in 2030 and 88% in 2050 compared to the same years in SSP1\_CLE. In 2050, CO<sub>2</sub> emissions from MSW will be 26% lower compared to the corresponding baseline (CLE). In 2035, it will be possible to eliminate air pollution from open burning of MSW.

SSP2\_MFR: MSW generation is expected to be the same as in SSP2\_CLE due to the absence of measures targeting its reduction. There is an improvement in the global waste management system at a global level, however, inequalities are observed in the developing countries. Though those countries start taking MSW waste management as an important point in the political agenda, the implementation of the MSW management strategies, although possible, is challenging. After 2030, the implementation of the adopted measures shows an improvement. As a result, 45% less MSW, equivalent to 534 Tg/yr ends up in non-sanitary landfills/dumpsites in 2030 compared to the same year in SSP2\_CLE. The quantities of MSW openly burned can be reduce by about 49% in 2030. While this pathway does not really affect developed regions such as Europe (EU28 and EU West), North America and Oceania due to the maturity of the management systems, it certainly makes more difficult for the rest of the world to cope with the increasing quantities of MSW generation. Thus, CH<sub>4</sub> emissions will increase 4% in 2030 and a maximum reduction of 57% will be observed in 2050 compared to the same years in SSP2\_CLE. CO<sub>2</sub> emissions will increase by 25% in 2050. A maximum emission reduction of particulate matter and air pollutants of 48% is observed in 2030.

SSP3\_MFR: This scenario depicts the lowest MSW generation quantities within the modelled scenarios, due to the little economic growth and slow urbanization. The improvement of MSW management systems is rather slow resulting from the lack of investment, international support, and education. While the developed world can continue enhancing the MSW systems within the circular economy framework, developing countries really struggle with the quantities of MSW generation, thus,

reaching the target of ~zero emissions from MSW management in 2050 is more than challenging. Particularly, rural areas start adopting strategies to improve MSW systems after 2030. Due to the slow adoption of measures, the maximum reduction of MSW ending in landfills/dumpsites and MSW open burned will be 55% and 32% in 2030, respectively. With the improvement of MSW management is still expected that 533 Tg/yr will end up in non-sanitary landfills/dumpsites in 2030. Thus, generating 3% more CH<sub>4</sub> emissions for the same year compared to the baseline. MSW openly burned will be reduced to 391 Tg/yr in 2030 and reach ~zero in 2050. After 2030 developing countries start to replicate measures from the developed world thus there is a decline in emissions towards 2050. In the SSP3\_MFR scenario, CH<sub>4</sub> emissions are estimated to be 23696 Gg/yr in 2050 being the highest in all MFR scenarios.

SSP4\_MFR: Similarly, to SSP3\_MFR, this scenario reflects the inequalities between the high- and middle-income countries and the low-income countries. This is reflected in the pace and level of the adopted measures to deal with the amounts of MSW generated. While this socio-economic development does not really affect industrialized regions, certainly is difficult for developing countries to improve MSW, particularly in rural areas. The slow phase-in of circular MSW management still leaves 994 Tg/yr of MSW to end up in non-sanitary landfills/dumpsites in 2030. MSW openly burned will be reduced to 554 Tg/yr in 2030 and reach ~zero in 2050. CH<sub>4</sub> emissions will be rather the same in the SSP4\_CLE and SSP4\_MFR scenarios by 2030 while maximum reduction of particulate matter and air pollutants in the MFR will be 37% compared to their CLE counterparts. CH<sub>4</sub> emissions are expected to be reduced to 22791 Gg/yr in 2050. The reduction of particulate matter and air pollutants is proportional to the reduction of MSW openly burned. CO<sub>2</sub> are expected to increase to 283600 Gg/yr in 2050 which is 24% higher compared to the SSP4\_CLE.

SSP5\_MFR: As a result of the increase in global income MSW generation reaches the highest quantities among the modelled scenarios. However, due to the MSW technology transfer and capacity building in the less favored countries, it is possible to drastically improve MSW systems, in both urban and rural areas, and hence reduce emissions. Still, solutions are focused only on technical approaches and end-of-pipe solutions and measures targeting reduction of MSW generation at source are lacking. Regions as Africa, India, South Asia and Latin America and the Caribbean quickly adopt anaerobic digestion to treat organic MSW and increase recycling rates of recyclables. Incineration plays an important role in the treatment of refuse. Even with the fast implementation of the circular MSW management systems, we estimate that 160 Tg/yr of MSW will still end up in non-sanitary landfills/dumpsites in 2030. 43 Tg/yr of MSW are expected to be open burned in 2030. CH<sub>4</sub> will be reduced to 80% in 2050 compared to SSP5\_CLE, i.e., 10881 Gg/yr CH<sub>4</sub> will be emitted in 2050. As MSW open burned is estimated to be reduced by 93% in 2030 compared to SSP5\_CLE, particulate matter and air pollutants from this source are reduced at the same level. We estimate that towards 2050 MSW open burned could be close to totally avoidable and therefore emissions associated to this practice as well.

ECLIPSE\_V6b\_MFR: The development of this scenario is quite similar to the SSP5\_MFR in which the focus is technological solutions. As MSW generation is a bit lower than in the SSP5, baseline emissions are also correspondingly lower. We estimate that 149 Tg/yr of MSW will still end up in non-sanitary landfills/dumpsites in 2030. 38 Tg/yr of MSW are expected to be open burned in 2030. CH<sub>4</sub> will be reduced to 79% in 2050 compared to ECLIPSE\_V6b\_CLE, i.e., 108881Gg CH<sub>4</sub> will be emitted in 2050. As MSW open burned is estimated to be reduced by 93% in 2030 compared to ECLIPSE\_V6b\_MFR, particulate matter and air pollutants from this source are reduced at a similar level.

### S3. Comparison of emissions from MSW

Table S2. Studies assessing Global CH<sub>4</sub> emissions from waste Tg/yr.

| Study                                | Sector | 2010 | 2011 | 2012 | 2013 | 2014 | 2015 | 2050  | Notes                                                                                |
|--------------------------------------|--------|------|------|------|------|------|------|-------|--------------------------------------------------------------------------------------|
| EDGARv 4.3.2 <sup>4</sup>            | Waste  | 37   | 38   | 37   | 37   | 38   | 38   |       | Includes industrial waste and MSW                                                    |
| CMIP6 <sup>5,6</sup>                 | Waste  | 33   | 33   | 33   | 34   | 34   | 34   |       | Includes industrial waste and MSW                                                    |
| Wiedinmyer et al., 2014 <sup>7</sup> | MSW    | 4    |      |      |      |      |      |       | Open burning of MSW                                                                  |
| Eclipse_V5a <sup>2</sup>             | MSW    | 35   |      |      |      |      | 30   | 57    |                                                                                      |
| This study                           | MSW    | 29   |      |      |      |      | 30   | 49-55 | Min 49 Tg for SSP3 and Max 55 Tg for SSP5. All other Scenarios in between this range |
| CMIP6 <sup>5,6</sup>                 | Total  | 371  |      | 381  |      | 388  | 388  |       |                                                                                      |
| Höglund-Isaksson, 2020 <sup>8</sup>  | Total  |      |      |      |      |      | 344  | 450   | Total global anthropogenic CH <sub>4</sub>                                           |

Table S3. Studies assessing Global CO<sub>2</sub> emissions from waste Tg/yr.

| Study                                | Sector | 2010 | 2011 | 2012 | 2013 | 2014 | 2015 | 2050    | Notes                                                            |
|--------------------------------------|--------|------|------|------|------|------|------|---------|------------------------------------------------------------------|
| EDGARv 4.3.2 <sup>4</sup>            | Waste  | 16   | 16   | 17   | 17   | 17   | 17   |         | Includes industrial waste and MSW. Incineration and open burning |
| CMIP6 <sup>5,6</sup>                 | Waste  | 112  | 116  | 120  | 124  | 129  | 130  |         | Includes industrial waste and MSW                                |
| Wiedinmyer et al., 2014 <sup>7</sup> | MSW    | 1413 |      |      |      |      |      |         | Open burning of MSW                                              |
| This study                           | MSW    | 133  |      |      |      |      | 150  | 242-308 | Includes incineration and open burning of MSW                    |



Table S4. Studies assessing global emissions from waste Tg/yr.

| Study                        | Sector | year | PM2.5 | BC    | OC    | CO    | SO2   | NOx   | VOCs  | Notes                                                                                                                        |
|------------------------------|--------|------|-------|-------|-------|-------|-------|-------|-------|------------------------------------------------------------------------------------------------------------------------------|
| EDGARv<br>4.3.2 <sup>4</sup> | Waste  | 2012 | 0.107 | 0.006 | 0.010 | 0.040 | 0.040 | 0.090 | 0.030 | Emissions from solid waste disposal sites and waste incineration                                                             |
| CMIP6 <sup>5,6</sup>         | Waste  | 2015 |       | 0.7   | 4     | 40    | 0.5   | 6     | 7     | Includes industrial waste and MSW                                                                                            |
| Eclipse_V5a <sup>2</sup>     | MSW    | 2015 | 2.5   | 0.4   | 1     | 10    | 0.1   | 0.3   | 1.4   |                                                                                                                              |
| Wiedinmyer<br>et al., 2014   | MSW    | 2010 | 6     | 0.6   | 5     | 37    | 0.5   | 4     | 7     | Emissions from open burning of MSW. VOC identified.                                                                          |
| This study                   | MSW    | 2015 | 2.3   | 0.17  | 1.4   | 11    | 0.08  | 0.4   | 2.2   | Includes incineration and open burning of MSW                                                                                |
| Eclipse_V5a <sup>2</sup>     | Total  | 2010 | 110   | 10    | 33    | 511   | 85    | 89    | 104   | Estimates for PM2.5, BC, OC represent global total, whereof about 52% anthropogenic. Other pollutants refer to anthropogenic |
| CMIP6 <sup>5,6</sup>         | Total  | 2015 |       | 10    | 35    | 934   | 94    | 156   | 227   | Total global emissions                                                                                                       |

#### S4. Description of the SSPs.

The Shared Socioeconomic Pathways (SSPs) provide five plausible pathways about probable world's socioeconomic development. Each SSP is accompanied by a narrative and a quantification of development <sup>9</sup>. A short description of the narratives in terms of economic development and demographics for each SSPs is presented below (see ref<sup>10</sup>):

- SSP1 'Sustainability': Economic growth is moderately high in developing countries leading to a reduction of inequality within and between countries. Low material growth and resource use. Current high fertility countries move towards low population while in low fertility countries there is an increase of fertility rates. Urbanization is still high in developing countries, the negative effects associated with it are limited.
- SSP2 'Middle of the road': Moderate economic growth. Income distribution shows an improvement but still inequalities are observed. Population growth is moderate, and urbanization is consistent with the historical trend.
- SSP3 'Regional Rivalry': Little economic growth due to lack of investment in education and technology. High inequalities within and between countries. Population growth is high, and urbanization slow.
- SSP4 'Inequality': Medium economic growth in high- and middle-income countries while low-income countries are far left behind. Thus, reflected in the high and low consumption patterns of the respective economies. Industrialized countries depict low fertility rates and population growth. In low-income countries urbanization is high forming urban-slums.
- SSP5 'Fossil Fueled Development': Income inequality decreases within regions and per capita income increases at a global level. Global population declines. Regions reach high level of urbanization.

Table S5. Description of the scenarios

| Scenario    | Socio-economic aspects                                                                                                                  | Environmental policy                                       | Circular MSW management systems (MFR)                                                                                                                                                                                                      |
|-------------|-----------------------------------------------------------------------------------------------------------------------------------------|------------------------------------------------------------|--------------------------------------------------------------------------------------------------------------------------------------------------------------------------------------------------------------------------------------------|
| SSP1        | Low population growth<br>Declining inequality<br>Global cooperation                                                                     | Strong environmental policy                                | Food and plastic waste reduction of 50% by the year 2030<br>Global implementation of circular MSW management systems<br>Air pollution and GHGs emissions caused by inappropriate waste management are avoided.                             |
| SSP2        | Moderate economic growth<br>Moderate population growth                                                                                  | Slow progress in achieving environmental targets and SDGs. | High income regions implement circular MSW successfully. Middle income regions implement the systems at a slow pace. All other countries improve their MSW management systems but are still left behind in terms of implementation.        |
| SSP3        | High population growth<br>Slow economic growth in developing countries                                                                  | Environmental concerns not a priority                      | High income regions implement circular MSW successfully. Middle income regions implement the systems at a slow pace. All other countries are left far behind. Disparities between waste management in urban and rural areas are notorious. |
| SSP4        | Medium economic growth in high- and middle-income countries.<br>Low economic growth in low-income countries<br>Social cohesion degrades | Environmental priority for the few affluent                | High income regions implement circular MSW successfully. Middle income regions implement the systems at a slow pace. All other countries struggle to cope with the large quantities of waste generated.                                    |
| SSP5        | Rapid economic growth<br>Global population declines                                                                                     | Low regard for environment and SDGs                        | Global implementation of circular MSW management systems<br>No measures to reduce MSW generation<br>High air pollution controls                                                                                                            |
| ECLIPSE_V6b | The rate of growth in population slows over time<br>Global economic activity continues to strengthen                                    | Some progress in achieving environmental targets and SDGs. | Global implementation of circular MSW management systems<br>No measures to reduce MSW generation<br>High air pollution controls                                                                                                            |

## S5. Abbreviations

Table S6. Abbreviations

|                   |                                                               |
|-------------------|---------------------------------------------------------------|
| BC                | Black Carbon                                                  |
| CE                | Circular Economy                                              |
| CH <sub>4</sub>   | Methane                                                       |
| CLE               | Current Legislation                                           |
| CO                | Carbon Oxide                                                  |
| CO <sub>2</sub>   | Carbon Dioxide                                                |
| EF                | Emission Factor                                               |
| EU                | European Union                                                |
| GAINS             | Greenhouse Gas- Air pollution Interaction and Synergies model |
| GDP               | Gross Domestic Product                                        |
| GHG               | Greenhouse Gases                                              |
| IAMs              | Integrated Assessment Models                                  |
| IEA               | International Energy Agency                                   |
| IPCC              | Intergovernmental Panel on Climate Change                     |
| MFR               | Maximum Technically Reduction                                 |
| MSW               | Municipal Solid Waste                                         |
| NO <sub>x</sub>   | Nitrogen Oxide                                                |
| OC                | Organic Carbon                                                |
| PM <sub>2.5</sub> | Particulate Matter $\leq 2.5 \mu\text{g}$                     |
| SDGs              | Sustainable Development Goals                                 |
| SO <sub>2</sub>   | Sulfur Dioxide                                                |
| SSPs              | Shared Socioeconomic Pathways                                 |
| UN                | United Nations                                                |
| VOCs              | Volatile organic compounds                                    |
| WEO               | World Energy Outlook                                          |

S6. GDP per capita and share of urban population.

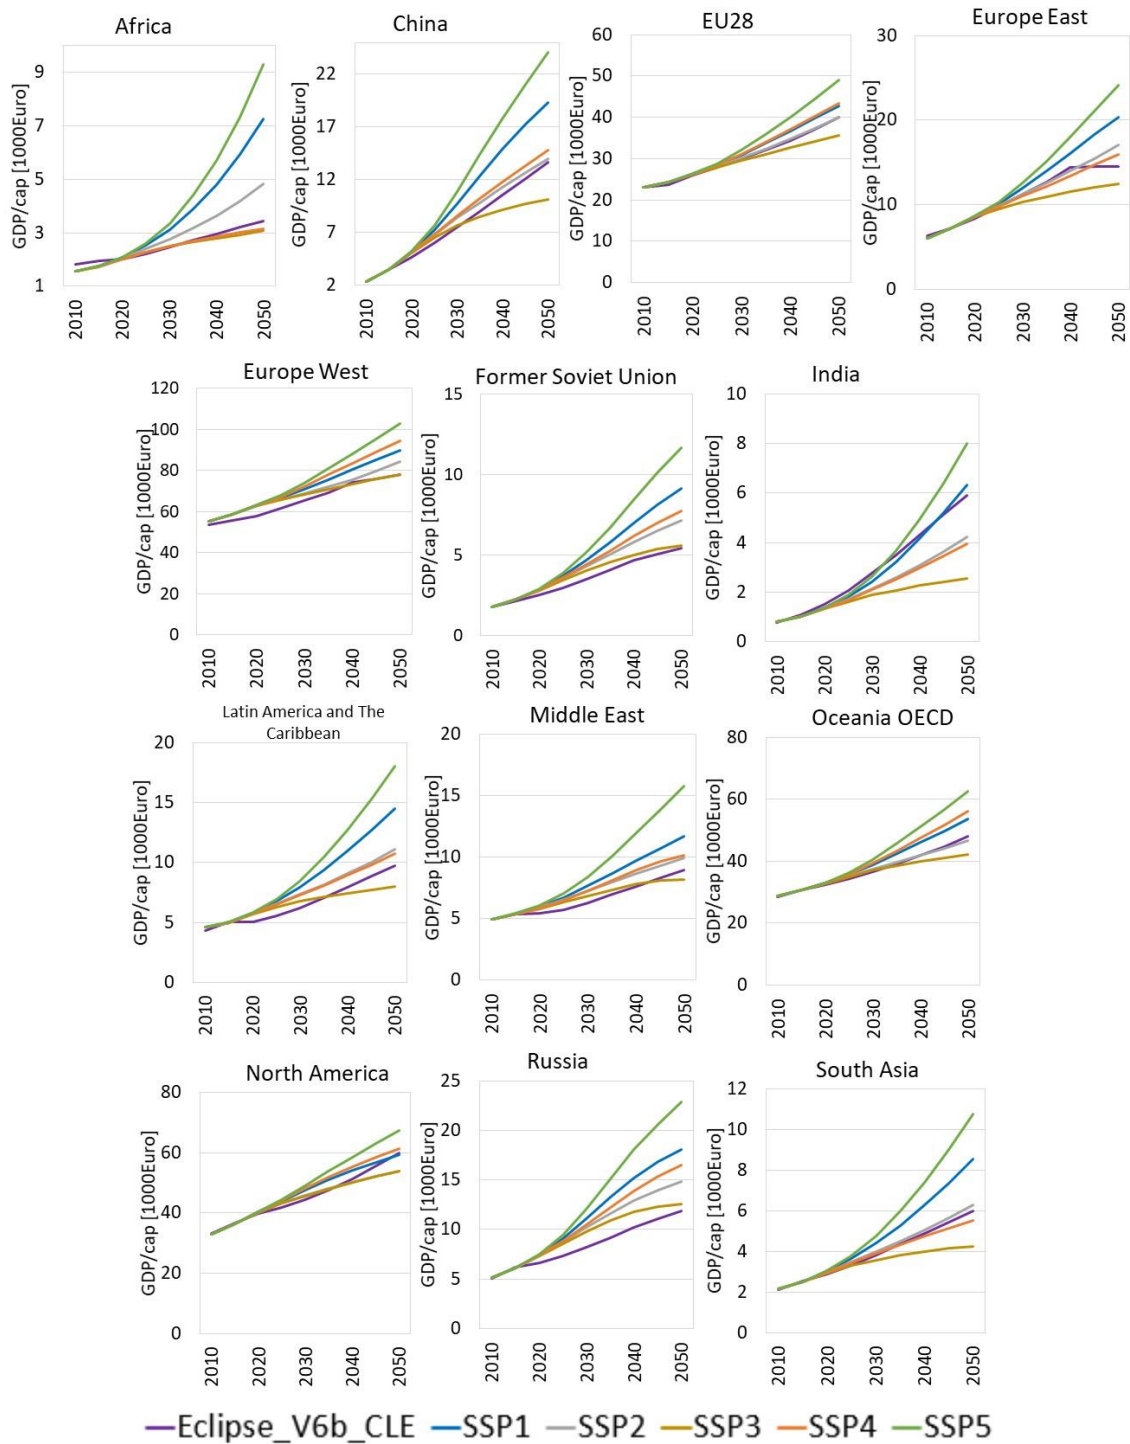

Fig. S2 . GDP per capita by region

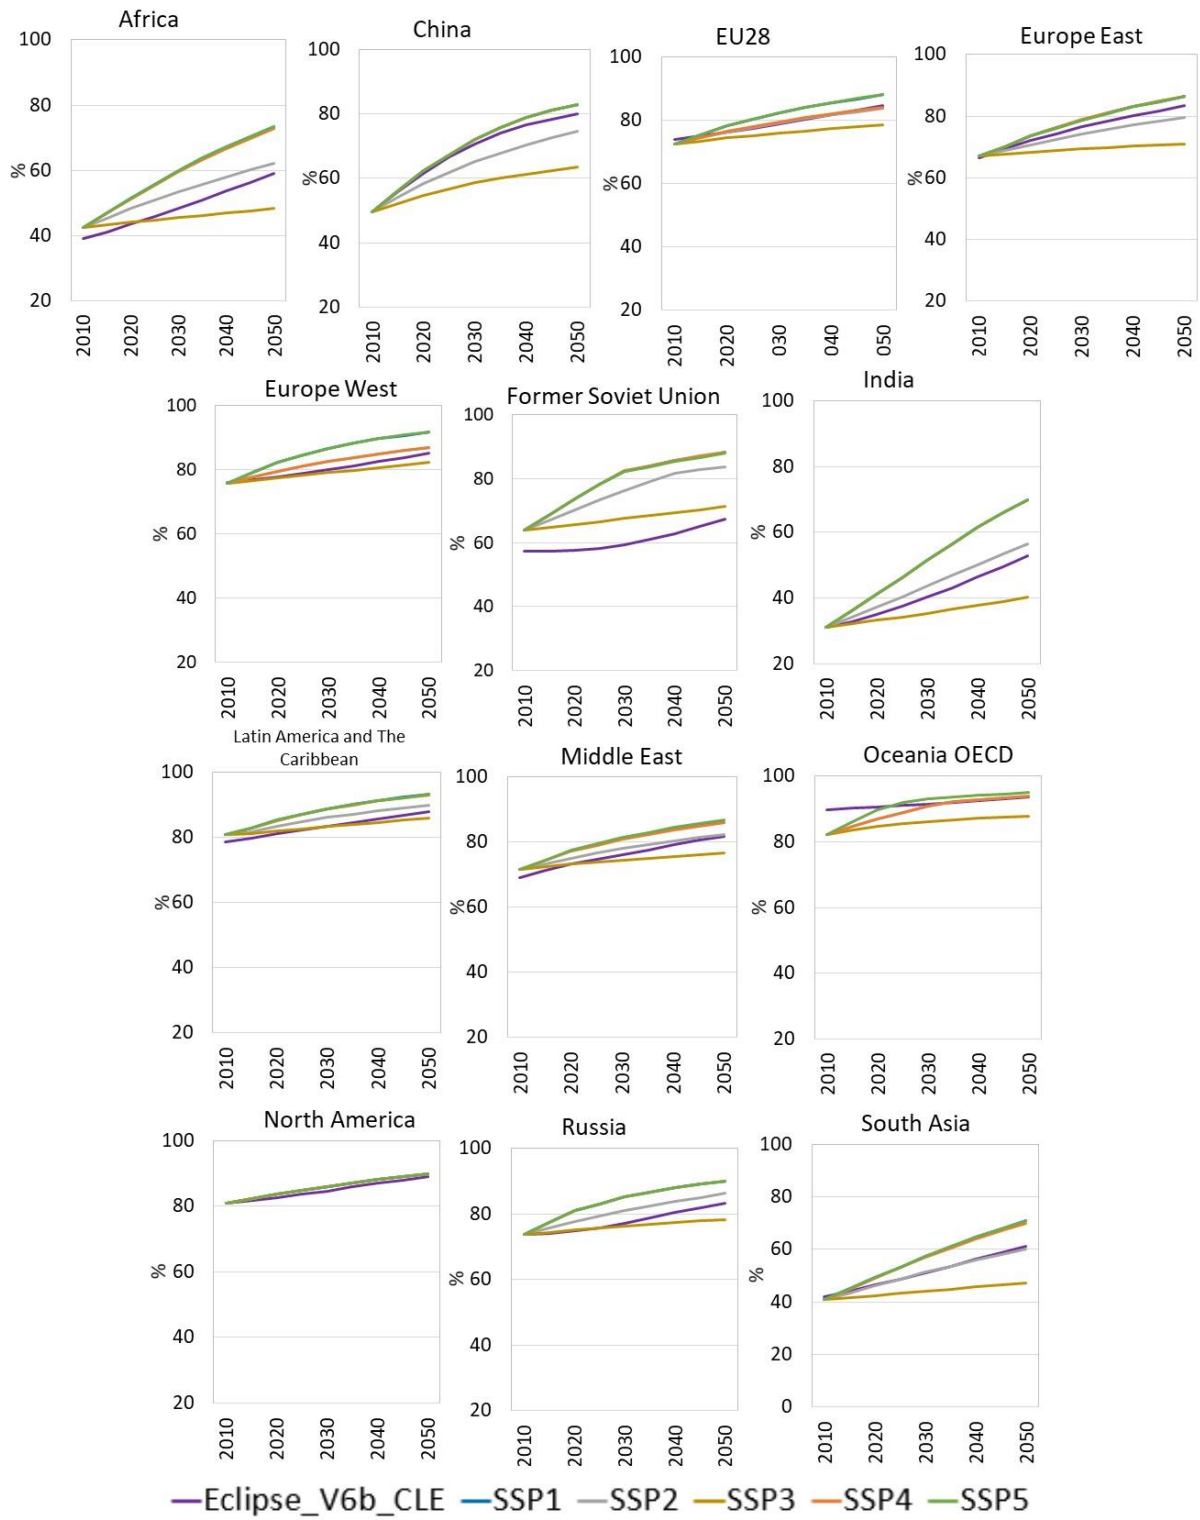

Fig. S3. Share of urban population by region.

## S7. Description of the methodology to project municipal solid waste generation and composition.

A new methodology to project municipal solid waste generation and waste composition by income group was developed based on the assumption that average national waste generation rate and composition vary depending on the average national income level ref<sup>11-13</sup> <sup>12</sup>. Numerous studies <sup>12,14-16</sup> indicate that composition of municipal solid waste depends on socio-economic characteristics, geographical location and environmental features. Paper and plastic wastes are the main fractions of MSW in high-income countries, while food waste dominates in low income countries <sup>12</sup>. A panel data analysis is performed to determine the elasticity of the different variables on the generation of municipal solid waste per capita. The driver to project future municipal solid waste generation is GDP per capita (urbanization rate was also included as an explanatory variable, however, it has shown to be insignificant in all cases). Furthermore, since waste composition influences the carbon content and hence the material and energy recovery potential, projections of waste composition are needed. For future years, the composition of waste is recalculated based on an estimated elasticity of per capita food waste to GDP per capita. After projecting the future generation of food waste per capita, other types of waste are projected to make up the rest of total per capita MSW generated with the relative contribution of non-food waste in 2015 kept constant in future years.

Description of the variables and data to estimate MSW generation elasticities: Three different variables are used to run the panel analysis, namely, historical municipal solid waste generation per capita, gross domestic product per capita and urbanization rates. All variables are specified in logarithmic form in order to provide parameter estimates that can be directly interpreted as elasticity values. In total, the unbalanced panel data set comprises 1006 observations. In order to control for the influence of population growth, waste generation per capita is chosen instead of total waste generation as dependent variable in elasticity estimations <sup>17</sup>. Data on historical municipal solid waste generation in kilogram per capita are obtained from different sources (Table 1). The dataset for EU28 countries covers from 1995 to 2017, for some OECD countries the data covers between 5 and 31 years (e.g., Japan and South Korea).

Table S7. Urban-rural MSW generation per capita ratio

| Country                  | Years      | Waste generation data - Source                                                                                                                                                                                                                                                                                                                                                                                          |
|--------------------------|------------|-------------------------------------------------------------------------------------------------------------------------------------------------------------------------------------------------------------------------------------------------------------------------------------------------------------------------------------------------------------------------------------------------------------------------|
| EU 28 countries          | 1995-2017  | Eurostat (retrieved 2020) Table [env_wasmun]. Ireland: Environmental protection Ireland<br><a href="https://www.epa.ie/nationalwastestatistics/irelandswastestory/">https://www.epa.ie/nationalwastestatistics/irelandswastestory/</a> Finland: Statistics Finland/Waste statistics, Finnish Environment Institute (SYKE)                                                                                               |
| Norway                   | 1995-2017  | Waste statistics from statistics Norway <a href="https://www.ssb.no/en/avfkomm">https://www.ssb.no/en/avfkomm</a>                                                                                                                                                                                                                                                                                                       |
| Switzerland              | 1995-2013  | Eurostat (retrieved 2020) Table [env_wasmun]                                                                                                                                                                                                                                                                                                                                                                            |
| Australia                | 2006-2015  | OECD (retrieved 2020) Table [Municipal waste] and Australian Bureau of Statistics -waste accounts<br><a href="https://www.abs.gov.au/statistics/environment/environmental-management/waste-account-australia-experimental-estimates/2018-19">https://www.abs.gov.au/statistics/environment/environmental-management/waste-account-australia-experimental-estimates/2018-19</a>                                          |
| Japan                    | 1985-2016  | OECD (retrieved 2020) Table [Municipal waste]                                                                                                                                                                                                                                                                                                                                                                           |
| South Korea              | 1985-2016  | OECD (retrieved 2020) Table [Municipal waste]                                                                                                                                                                                                                                                                                                                                                                           |
| Mexico                   | 1991-2012  | OECD (retrieved 2020) Table [Municipal waste]                                                                                                                                                                                                                                                                                                                                                                           |
| New Zealand              | 2002-2017  | OECD (retrieved 2020) Table [Municipal waste]                                                                                                                                                                                                                                                                                                                                                                           |
| United States of America | 1990- 2015 | Advancing Sustainable Materials Management: 2018 Tables and Figures Assessing Trends in Materials Generation and Management in the United States November 2020. <a href="https://www.epa.gov/facts-and-figures-about-materials-waste-and-recycling/advancing-sustainable-materials-management">https://www.epa.gov/facts-and-figures-about-materials-waste-and-recycling/advancing-sustainable-materials-management</a> |
| Brazil                   | 2000-2012  | OECD (retrieved 2020) Table [Municipal waste]                                                                                                                                                                                                                                                                                                                                                                           |
| Chile                    | 2000-2016  | OECD (retrieved 2020) Table [Municipal waste]                                                                                                                                                                                                                                                                                                                                                                           |
| Israel                   | 2000-2017  | OECD (retrieved 2020) Table [Municipal waste]                                                                                                                                                                                                                                                                                                                                                                           |
| Colombia                 | 2003-2011  | SSPD 2011, OECD (retrieved 2020) Table [Municipal waste]                                                                                                                                                                                                                                                                                                                                                                |
| Russia                   | 1999-2011  | OECD (retrieved 2020) Table [Municipal waste]                                                                                                                                                                                                                                                                                                                                                                           |
| Turkey                   | 1995-2017  | Eurostat (retrieved 2020) Table [env_wasmun]                                                                                                                                                                                                                                                                                                                                                                            |
| Serbia                   | 2006-2017  | Eurostat (retrieved 2020) Table [env_wasmun]                                                                                                                                                                                                                                                                                                                                                                            |
| Macedonia                | 2008-2017  | Eurostat (retrieved 2020) Table [env_wasmun]                                                                                                                                                                                                                                                                                                                                                                            |
| Malaysia                 | 1996-2000  | Department of statistics Malaysia (accessed 2016)                                                                                                                                                                                                                                                                                                                                                                       |
| Kenya                    | 1998-2009  |                                                                                                                                                                                                                                                                                                                                                                                                                         |
| Montenegro               | 2008-2017  | Eurostat (retrieved 2020) Table [env_wasmun]                                                                                                                                                                                                                                                                                                                                                                            |
| Bosnia and Herzegovina   | 2008-2017  | Eurostat (retrieved 2020) Table [env_wasmun]                                                                                                                                                                                                                                                                                                                                                                            |
| Kosovo                   | 2015-2017  | Eurostat (retrieved 2020) Table [env_wasmun]                                                                                                                                                                                                                                                                                                                                                                            |
| Peru                     | 2012-2015  | Municipalidad Metropolitana de Lima (MML) 2015                                                                                                                                                                                                                                                                                                                                                                          |

\*Eurostat database<sup>18</sup> OECD database<sup>19</sup>

Data on Gross Domestic Product per capita in constant 2010 US dollars was obtained from the World development Indicators (World Bank, retrieved 2020). Urban population information was obtained



from EUROSTAT Table [EU-SILC survey [ilc\_lvho01]] for EU28 and from the World Development Indicators (retrieved 2020) for other countries. To get an agreement between the dataset and guarantee consistency some adjustments on the information were needed due to the different definition of urbanization.

Elasticity estimation models: Historical data on municipal solid waste generation per capita (dependent variable) are plotted against GDP per capita (independent variable) in order to visualize the relationship between the two variables and to identify possible clusters of municipal waste generation (Fig. S4).

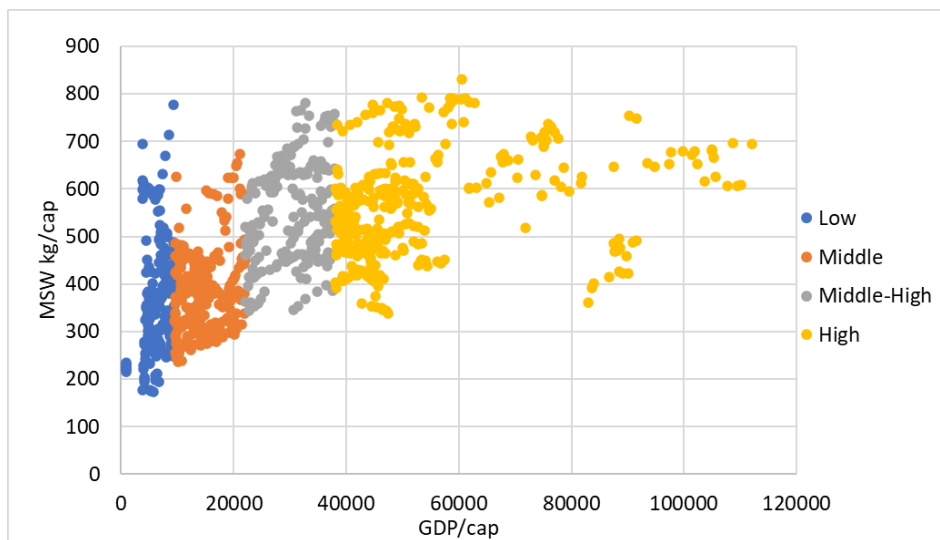

**Fig. S4.** Municipal solid waste vs GDP per capita.

The definition of the different income groups was carried out based on the distribution of the scatterplot. Note that in the subsequent projections, countries may over time move out of their initial income group into a higher income group following an increase in the GDP per capita. Hence, the group distribution of the municipal solid waste generation is dynamic over time. It is important to notice that this income group definition is independent than that of the World Bank or any other income classification. The income group definition here is specifically related to MSW generation.

The different income groups are classified as follows (GDP in constant 2010 US\$): Low-income group is formed by countries/regions with GDP per capita lower than 9500 US\$/year, middle-income group represents countries/regions with GDP per capita higher-equal than 9500 US\$/year and lower than 22000 US\$/year; middle-high income group represents countries/regions with GDP per capita higher-equal than 22000 US\$/year and lower than 38000 US\$/year and high-income group is formed by countries/regions with GDP per capita higher equal than 38000 US\$/year. The latter group was then carefully revised as evidence has shown that some countries have already implemented some waste prevention programs. Fact that could interfere in the relationship between the variables. Therefore, a subgroup of countries with GDP per capita higher-equal than 38000 US\$/year and years before

implementation of any waste prevention program was selected. At EU level, the Waste Framework Directive<sup>1</sup> requires Member States to adopt waste prevention programmes by December 2013. Therefore, the selection of the observations was done after reviewing the reported information in terms of MSW generation to EUROSTAT but also official national sources, together with a careful revision of the annual review progress in the completion and implementation of the programmes carried out by the European Environment Agency (EEA) in 2019<sup>2</sup>. For countries outside the EU (i.e., Japan), a similar process was carried out in which reported values were contrasted to the implementation of strategies and regulations to reduce MSW generation.

Furthermore, since waste composition influences on the one hand emissions of air pollutants and greenhouse gases and on the other hand, the circularity of resources, projections of waste composition are relevant. In particular, low-income countries tend to have a considerably higher fraction of food waste in the total municipal waste generated than high income countries. Therefore, changes in the future composition of waste are projected by income group based on an estimated elasticity of food waste generation to GDP per capita. Historical data on food waste generation is taken from ref<sup>20</sup>. The dataset comprises 882 observations in total. The elasticity is estimated for the same income groups as MSW in unbalanced panels. The panel data analysis is performed to determine the elasticity of the different variables on the generation of municipal solid waste per capita. Pooled OLS, fixed effects and random effects estimator models are run to test the effects of the explanatory variables on municipal waste generation per capita. In the pooled models a single slope is calculated for all countries and the between (cross-sectional) and within (time) variances are bluntly added up. When the cross-sectional variance is eliminated and the slopes are based on time variance only, the model is denoted a within estimator whereas in between models the time variance is eliminated and only cross-sectional variance is considered in the elasticity parameter. In fixed effect models, the within estimator is describing the slope while the country-specific effects are captured as country-specific constants. Finally, random effect model treats the individual effects as random variables and the variance is a weighted average of within and between variance<sup>21</sup>. Three different tests are applied to select the appropriate model. A Lagrange Multiplier (LM) test is applied to test for the cross-sectional dependence in heterogeneous panels (test random effects vs pooling). An F test is used to test for individual effects based on the comparison between the within and the pooling model and a Hausman test is used to evaluate the difference in vector coefficients between the fixed and random effects models. The results of the elasticity estimations of municipal solid waste generation to GDP per capita and urbanization rate and elasticity estimations of food waste generation (fraction in MSW) to GDP per capita are presented in Table S

---

<sup>1</sup> Directive 2008/98/EC, Article 29.

<sup>2</sup> [https://www.eea.europa.eu/themes/waste/waste-prevention/countries/folder\\_contents?pagenumber=2&pagesize=20](https://www.eea.europa.eu/themes/waste/waste-prevention/countries/folder_contents?pagenumber=2&pagesize=20)

Table S8. MSW generation elasticities to GDP per capita and urbanization rate

| Variable<br>kg/cap | Income group<br>USD2010/cap | n  | Number of<br>observations | Explanatory<br>variable |                 |                 |                  | Hausman -<br>test |           |
|--------------------|-----------------------------|----|---------------------------|-------------------------|-----------------|-----------------|------------------|-------------------|-----------|
|                    |                             |    |                           |                         | OLS             | Fixed<br>Effect | Random<br>Effect |                   | LM - test |
| MSW                | <9500                       | 23 | 166                       | Constant                | 0.001           |                 | 0.015            | 8.835             | 23.012    |
|                    |                             |    |                           | GDP per capita          | 0.000           | 0.375***        | 0.008            |                   |           |
|                    |                             |    |                           | Urbanization rate       | 0.013           | 0.003           | 0.011            |                   |           |
|                    |                             |    |                           | R-square                | -0.010          | -0.001          | -0.008           |                   |           |
|                    | <9500                       | 23 | 166                       | Constant                | -0.001          | <b>0.375***</b> | 0.013            | 8.923             | 23.643    |
|                    |                             |    |                           | GDP per capita          | 0.000           |                 | 0.007            |                   |           |
|                    |                             |    |                           | Urbanization rate       |                 |                 |                  |                   |           |
|                    |                             |    |                           | R-square                | -0.006          | <b>0.006</b>    | 0.446            |                   |           |
|                    | <9500                       | 23 | 166                       | Constant                | 0.001           |                 | 0.010            | 6.692             | 0.063     |
|                    |                             |    |                           | GDP per capita          |                 |                 |                  |                   |           |
|                    |                             |    |                           | Urbanization rate       | 0.013           | 0.009           | 0.011            |                   |           |
|                    |                             |    |                           | R-square                | -0.004          | -0.161          | -0.004           |                   |           |
| FW                 | <9500                       | 23 | 166                       | Constant                | -0.023***       |                 | 5.033***         | 25.425            | 55.065    |
|                    |                             |    |                           | GDP per capita          | -0.002          | <b>0.176***</b> | 0.161***         |                   |           |
|                    |                             |    |                           | Urbanization rate       |                 |                 |                  |                   |           |
|                    |                             |    |                           | R-square                | 0.006           | <b>0.473</b>    | 0.681            |                   |           |
| MSW                | >=9500 - <22000             | 18 | 253                       | Constant                | -0.024**        |                 | -0.023~          | 2.351             | 2.438     |
|                    |                             |    |                           | GDP per capita          | 0.250***        | 0.175**         | 0.224***         |                   |           |
|                    |                             |    |                           | Urbanization rate       | -0.504~         | -0.127          | -0.357           |                   |           |
|                    |                             |    |                           | R-square                | 0.080           | -0.032          | 0.060            |                   |           |
|                    | >=9500 - <22000             | 18 | 253                       | Constant                | -0.046***       |                 | <b>-0.022</b>    | 34.273            | 1.818     |
|                    |                             |    |                           | GDP per capita          | 0.364***        | 0.160**         | <b>0.183***</b>  |                   |           |
|                    |                             |    |                           | Urbanization rate       |                 |                 |                  |                   |           |
|                    |                             |    |                           | R-square                | 0.085           | -0.028          | <b>0.058</b>     |                   |           |
|                    | >=9500 - <22000             | 18 | 253                       | Constant                | -0.016*         |                 | -0.015           | 3.286             | 1.054     |
|                    |                             |    |                           | GDP per capita          |                 |                 |                  |                   |           |
|                    |                             |    |                           | Urbanization rate       | 0.291           | 0.551*          | 0.437~           |                   |           |
|                    |                             |    |                           | R-square                | 0.002           | -0.059          | 0.008            |                   |           |
| FW                 | >=9500 - <22000             | 18 | 253                       | Constant                | <b>0.004***</b> |                 | 5.052***         | 1.002             | 0.001     |
|                    |                             |    |                           | GDP per capita          | <b>0.133***</b> | 0.130***        | 0.130***         |                   |           |
|                    |                             |    |                           | Urbanization rate       |                 |                 |                  |                   |           |
|                    |                             |    |                           | R-square                | <b>0.628</b>    | 0.521           |                  |                   |           |
| MSW                | >=22000 - <38000            | 22 | 201                       | Constant                | -0.011          |                 | -0.021           | 8.378             | 0.368     |
|                    |                             |    |                           | GDP per capita          | 0.204***        | 0.258**         | 0.241***         |                   |           |
|                    |                             |    |                           | Urbanization rate       | -0.263          | -0.042          | -0.104           |                   |           |
|                    |                             |    |                           | R-square                | 0.096           | -0.061          | 0.078            |                   |           |
|                    | >=22000 - <38000            | 22 | 201                       | Constant                | -0.011          |                 | <b>-0.021</b>    | 8.616             | 0.174     |
|                    |                             |    |                           | GDP per capita          | 0.186***        | 0.254***        | <b>0.233***</b>  |                   |           |
|                    |                             |    |                           | Urbanization rate       |                 |                 |                  |                   |           |
|                    |                             |    |                           | R-square                | 0.090           | -0.055          | <b>0.081</b>     |                   |           |
|                    | >=22000 - <38000            | 22 | 201                       | Constant                | -0.007          |                 | -0.022           | 7.436             | 9.389     |
|                    |                             |    |                           | GDP per capita          |                 |                 |                  |                   |           |
|                    |                             |    |                           | Urbanization rate       | -0.027          | 0.312           | 0.088            |                   |           |
|                    |                             |    |                           | R-square                | -0.005          | -0.115          | 0.006            |                   |           |
| FW                 | >=22000 - <38000            | 22 | 201                       | Constant                | -0.023*         |                 | 5.164***         | 4.513             | 0.108     |
|                    |                             |    |                           | GDP per capita          | -0.232***       | -0.023          | -0.036           |                   |           |
|                    |                             |    |                           | Urbanization rate       |                 |                 |                  |                   |           |
|                    |                             |    |                           | R-square                | 0.083           | -0.123          | 0.826            |                   |           |

| Variable<br>kg/cap | Income group<br>USD2010/cap | Number of<br>observations |     | Explanatory<br>variable | OLS       | Fixed<br>Effect | Random<br>Effect | LM - test | Hausman -<br>test |
|--------------------|-----------------------------|---------------------------|-----|-------------------------|-----------|-----------------|------------------|-----------|-------------------|
|                    |                             | n                         |     |                         |           |                 |                  |           |                   |
| MSW                | >=38000*                    | 16                        | 230 | Constant                | -0.001    |                 | -0.001           | 0.051     | 0.024             |
|                    |                             |                           |     | GDP per capita          | 0.536***  | 0.537 ***       | 0.536***         |           |                   |
|                    |                             |                           |     | Urbanization rate       | 0.027     | 0.019           | 0.027            |           |                   |
|                    |                             |                           |     | R-square                | 0.8971    | 0.256           | 0.303            |           |                   |
|                    | >=38000*                    | 16                        | 230 | Constant                | -0.001    |                 | -0.001           | 0.051     | 0.002             |
|                    |                             |                           |     | GDP per capita          | 0.539***  | 0.539***        | <b>0.539***</b>  |           |                   |
|                    |                             |                           |     | Urbanization rate       |           |                 |                  |           |                   |
|                    |                             |                           |     | R-square                | 0.307     | 0.259           | <b>0.307</b>     |           |                   |
|                    | >=38000*                    | 16                        | 230 | Constant                | -0.003    |                 | -0.003           | 0.043     | 0.068             |
|                    |                             |                           |     | GDP per capita          |           |                 |                  |           |                   |
|                    |                             |                           |     | Urbanization rate       | 0.473**   | 0.488**         | 0.473**          |           |                   |
|                    |                             |                           |     | R-square                | 0.027     | -0.041          | 0.027            |           |                   |
| FW                 | >=38000                     | 16                        | 230 | Constant                | 0.000     |                 | 5.120***         | 6.681     | 3.611             |
|                    |                             |                           |     | GDP per capita          | -0.365*** | 0.056           | <b>0.051</b>     |           |                   |
|                    |                             |                           |     | Urbanization rate       |           |                 |                  |           |                   |
|                    |                             |                           |     | R-square                | 0.182     | -0.054          | 0.298            |           |                   |
| MSW                | All income groups           | 50                        | 892 | Constant                | -0.004    |                 | -0.001           | 0.046     | 0.051             |
|                    |                             |                           |     | GDP per capita          | 0.100***  | 0.099***        | 0.100***         |           |                   |
|                    |                             |                           |     | Urbanization rate       | 0.016     | 0.016           | 0.016            |           |                   |
|                    |                             |                           |     | R-square                | 0.025     | -0.033          | 0.025            |           |                   |
|                    | All income groups           | 50                        | 892 | Constant                | -0.004    |                 | <b>-0.004</b>    | 0.046     | 0.048             |
|                    |                             |                           |     | GDP per capita          | 0.103***  | 0.101***        | <b>0.103***</b>  |           |                   |
|                    |                             |                           |     | Urbanization rate       |           |                 |                  |           |                   |
|                    |                             |                           |     | R-square                | 0.001     | -0.032          | <b>0.025</b>     |           |                   |
|                    | All income groups           | 50                        | 892 | Constant                | -0.006    |                 | -0.006           | 0.061     | 0.010             |
|                    |                             |                           |     | GDP per capita          |           |                 |                  |           |                   |
|                    |                             |                           |     | Urbanization rate       | 0.042     | 0.002           | 0.042            |           |                   |
|                    |                             |                           |     | R-square                | 0.001     | -0.057          | 0.010            |           |                   |
| FW                 | All income groups           | 46                        | 927 | Constant                | -0.002    |                 | 5.102***         | 13.507    | 5.999             |
|                    |                             |                           |     | GDP per capita          | 0.099***  | <b>0.101***</b> | 0.085***         |           |                   |
|                    |                             |                           |     | Urbanization rate       |           |                 |                  |           |                   |
|                    |                             |                           |     | R-square                | 0.033     | <b>-0.013</b>   | 0.249            |           |                   |

Where:  $\varepsilon_{it} = u_i + v_{it}$  is an error term which is separated into an individual effects term and a residual omitted variables term, and  $\varepsilon_{it} \sim \text{IID}(0, \sigma_\varepsilon^2)$  is an error term which are assumed to be normally distributed with mean zero and constant variance. \* before implementation of waste prevention programmes or policies to reduce MSW generation.

## S8. Rural-urban waste generation ratio

Table S9. Urban-rural MSW generation per capita ratio

| Region                          | Rural<br>Urban<br>ratio | Comments                                                                                                                                                                                                  | Source           |
|---------------------------------|-------------------------|-----------------------------------------------------------------------------------------------------------------------------------------------------------------------------------------------------------|------------------|
| Africa                          | 0.53                    | Ratio between average kg/cap/year between North Africa (442) and Sub-Saharan Africa (237)                                                                                                                 | <sup>22</sup>    |
| China                           | 0.8/0.55                | Based on average rural waste generation rate of 0.95 kg/cap/day for the year 2010 for provinces with high urban areas and 0.55 for provinces with lower urban areas.                                      | <sup>23</sup>    |
| Latin America and the Caribbean | 0.56                    | Urban solid waste generation in LAC reaches between 0.6 to 0.93 kg/cap/day. Ratio between countries highly urbanized and less urbanized in Latin America.                                                 | <sup>24</sup>    |
| EU15                            | 0.8                     |                                                                                                                                                                                                           |                  |
| EU13                            | 0.6                     | Based on a study carried out in Romania in which average waste generation rate of 0.4 kg/cap/day is stipulated. However, in peri urban areas waste generation rates are close to the ones in urban areas. | <sup>25,26</sup> |
| North America                   | 0.8                     | Based on economic differences between urban and rural areas in the US.                                                                                                                                    | <sup>27</sup>    |
| Europe West                     | 0.8                     | Assumed to similar to EU15                                                                                                                                                                                |                  |
| Russia                          | 0.6                     | Assumed to be similar to EU13                                                                                                                                                                             |                  |
| Former Soviet Union             | 0.6                     | Assumed to be similar to EU13                                                                                                                                                                             |                  |
| Middle East                     | 0.6                     | Based on the reported MSW generation rates per capita for countries such as Mauritania, Morocco, Algeria, Tunisia, Egypt, Lebanon, Syria, Jordan, and Yemen.                                              | <sup>28</sup>    |
| Oceania                         | 0.8                     |                                                                                                                                                                                                           |                  |
| India                           | 0.55                    | Value based on MSW generation rates for different income levels, and specific reported data on urban/rural generation in Andhara Pradesh, Chandigarh, Kerala and Tamil Nadu.                              | <sup>29-32</sup> |
| South Asia                      | 0.5                     | Value based on a study carried out in Thailand on the different MSW generation rates in different household types.                                                                                        | <sup>33</sup>    |

## S9. Waste matrix in GAINS.

Table S10. Solid waste management technologies

| Solid waste management technology                                    | Municipal solid waste |       |       |       |       |         |         |      |
|----------------------------------------------------------------------|-----------------------|-------|-------|-------|-------|---------|---------|------|
|                                                                      | Food                  | Glass | Metal | Other | Paper | Plastic | Textile | Wood |
| Open burned                                                          | X                     |       |       | X     | X     | X       | X       | X    |
| Scattered and/or disposed to water-courses                           | X                     | X     | X     | X     | X     | X       | X       | X    |
| Unmanaged solid waste disposal site - low humidity - < 5m deep       | X                     |       |       | X     | X     |         | X       | X    |
| Unmanaged solid waste disposal site - high humidity - > 5m deep      | X                     |       |       | X     | X     |         | X       | X    |
| Compacted landfill                                                   | X                     | X     | X     | X     | X     | X       | X       | X    |
| Covered landfill                                                     | X                     |       |       | X     | X     |         | X       | X    |
| Landfill gas recovery and flaring                                    | X                     |       |       | X     | X     |         | X       | X    |
| Landfill gas recovery and used                                       | X                     |       |       | X     | X     |         | X       | X    |
| Low quality burning of waste                                         | X                     |       |       | X     | X     | X       | X       | X    |
| Incineration (poor air quality controls)                             | X                     |       |       | X     | X     | X       | X       | X    |
| Incineration (high quality air pollution controls - energy recovery) | X                     |       |       | X     | X     | X       | X       | X    |
| Anaerobic digestion                                                  | X                     |       |       |       |       |         |         |      |
| Composting                                                           | X                     |       |       |       |       |         |         |      |
| Recycling                                                            |                       | X     | X     |       | X     | X       | X       | X    |

## S10. MSW management narratives and regional aggregation.

Table S11. MSW management narratives

| Scenario | Description                                                                                                                                                                                                                                                                                                                                                                                                                                                                                                                                                                                                                                                                                                                                                                                                                                                                                                       |
|----------|-------------------------------------------------------------------------------------------------------------------------------------------------------------------------------------------------------------------------------------------------------------------------------------------------------------------------------------------------------------------------------------------------------------------------------------------------------------------------------------------------------------------------------------------------------------------------------------------------------------------------------------------------------------------------------------------------------------------------------------------------------------------------------------------------------------------------------------------------------------------------------------------------------------------|
| SSP1_MFR | <p>Maximum municipal food waste reduction of 50% by the year 2030 based on Lipinski et al., 2013<sup>34</sup> and based on the target adopted by the United Nations Assembly in 2015 of halving per capita food waste at the retail and consumer level as a part of the 2030 Sustainable Development Goals.</p> <p>A maximum municipal plastic waste rate reduction of 50% by the year 2030 as a part of the 2030 Sustainable Development Goals.</p> <p>Waste management policies are implemented at a global level resulting in an improvement of waste management systems.</p> <p>Waste technology transfer and capacity building is facilitated allowing the less favored countries to improve and develop appropriate waste management systems in both urban and rural areas. Hence, environmental impacts such as air pollution and GHGs emissions caused by inappropriate waste management are avoided.</p> |
| SSP2_MFR | <p>EU28, EU West, EU East, Oceania and North America regions continue developing and implementing policies to meet the proposed environmental targets related to waste.</p> <p>Russia and the Former Soviet Union countries also implement similar policies but a slower pace.</p> <p>All other countries either continue or start developing strategies to improve their waste management systems but are still left behind in terms of implementation.</p>                                                                                                                                                                                                                                                                                                                                                                                                                                                      |
| SSP3_MFR | <p>EU28, EU West, EU East, Oceania, and North America countries continue developing and implementing policies to meet the proposed environmental targets related to waste.</p> <p>Russia and The Former Soviet Union countries also implement similar policies but a slower pace.</p> <p>All other countries are left far behind due to a lack of international support in terms of technology transfer and capacity building. Environmental concerns related to waste are not a priority in these countries. Disparities between waste management in urban and rural areas are notorious.</p>                                                                                                                                                                                                                                                                                                                    |
| SSP4_MFR | <p>EU28, EU West, EU East, Oceania, and North America and Russia and The Former Soviet Union countries continue developing and implementing policies to meet the proposed environmental targets related to waste.</p> <p>Russia and The Former Soviet Union countries catch up with European countries in terms of waste management.</p> <p>All other countries continue struggling to cope with the large quantities of waste generated.</p>                                                                                                                                                                                                                                                                                                                                                                                                                                                                     |

|                 |                                                                                                                                                                                                                                                                |
|-----------------|----------------------------------------------------------------------------------------------------------------------------------------------------------------------------------------------------------------------------------------------------------------|
| SSP5_MFR        | Waste technology transfer and capacity building is facilitated allowing the less favored countries to improve and develop appropriate waste management systems in both urban and rural areas. However, policies targeted to waste reduction are still missing. |
| Eclipse_V6b_MFR | Waste management systems are improved at a global level. There is collaboration between and within nations. Reduction of environmental impacts caused by waste management are successfully implemented.                                                        |

Table S5. Regional Aggregation

| Income group                    | Country/region                                                                                                                                                                                                                                                                                                                                                                  |
|---------------------------------|---------------------------------------------------------------------------------------------------------------------------------------------------------------------------------------------------------------------------------------------------------------------------------------------------------------------------------------------------------------------------------|
| Africa                          | South Africa, Tanzania, Egypt, Kenya, Nigeria, North Africa (includes Algeria, Morocco, Libya, Tunisia, Sudan), East Africa, Western Africa, Rest Africa                                                                                                                                                                                                                        |
| China                           | Anhui, Beijing, Chongqing, Fujian, Gansu, Guangdong, Guangxi, Guizhou, Hainan, Hebei, Heilongjiang, Henan, Hong Kong and Macau, Hubei, Hunan, Jilin, Jiangsu, Jiangxi, Liaoning, Inner Mongolia, Ningxia, Qinghai, Shaanxi, Shanghai, Sichuan, Tianjin, Tibet, Xinjiang, Yunnan and Zhejiang                                                                                    |
| EU28                            | Austria, Belgium, Bulgaria, Cyprus, Croatia, Czech Republic, Denmark, Finland, France, Germany, Ireland, Luxembourg, Netherlands, Sweden, Greece, Malta, Portugal, Slovenia, Estonia, Hungary, Latvia, Lithuania, Poland, Romania, Slovak Republic, Italy, Spain, United Kingdom.                                                                                               |
| EU-East                         | Albania, Bosnia and Herzegovina, Kosovo, Macedonia, Montenegro, Serbia, Turkey.                                                                                                                                                                                                                                                                                                 |
| EU-West                         | Norway, Iceland, Switzerland                                                                                                                                                                                                                                                                                                                                                    |
| Former Soviet Union (FSOV)      | Armenia, Former Soviet Union States (includes Tajikistan, Turkmenistan, and Uzbekistan), Georgia, Azerbaijan, Kazakhstan, Belarus, Moldova, Kyrgyzstan                                                                                                                                                                                                                          |
| India                           | Andhra Pradesh, Assam, West Bengal, Bihar, Chhattisgarh, Delhi, North East (excl Assam), Goa, Gujarat, Haryana, Himachal Pradesh, Jharkhand, Karnataka, Kerala, Maharashtra, Manipur, Orissa, Punjab, Rajasthan, Tamil Nadu, Uttarakhand, Uttar Pradesh, Jammu Kashmir                                                                                                          |
| Latin America and The Caribbean | Argentina, Caribbean (includes countries in the Caribbean region), Chile, Brazil, Mexico, Central America, Colombia, Ecuador, Bolivia, Paraguay, Perú, Uruguay, Venezuela, and Other Latin America.                                                                                                                                                                             |
| Middle East                     | Middle East, Iran, Israel, Saudi Arabia                                                                                                                                                                                                                                                                                                                                         |
| North America                   | United States and Canada.                                                                                                                                                                                                                                                                                                                                                       |
| Oceania                         | Australia, New Zealand, Japan                                                                                                                                                                                                                                                                                                                                                   |
| Russia                          | Russia (Europe – Asia)                                                                                                                                                                                                                                                                                                                                                          |
| South Asia                      | Afghanistan, Bangladesh (Dhaka and rest of Bangladesh), Cambodia, North Korea, South Korea, Myanmar, Taiwan, Nepal, Pakistan (Karachi, NW frontier provinces Baluchistan, Punjab and Sindh), Philippines (Bicol, Luzon and Manila), Sri Lanka, Thailand (Bangkok, Central Valley, North Eastern Plateau, Northern Highlands and Southern Peninsula), Vietnam (North and South). |

## References

1. Anenberg, S. *et al.* Global air quality and health benefits of mitigating short-lived climate forcers. (2011).
2. Klimont, Z. *et al.* Global anthropogenic emissions of particulate matter including black carbon. *Atmospheric Chemistry and Physics* **17**, 8681–8723 (2017).
3. Reyna-Bensusan, N. *et al.* Experimental measurements of black carbon emission factors to estimate the global impact of uncontrolled burning of waste. *Atmospheric Environment* **213**, 629–639 (2019).
4. Crippa, M. *et al.* Gridded emissions of air pollutants for the period 1970–2012 within EDGAR v4.3.2. *Earth System Science Data* **10**, 1987–2013 (2018).
5. Gidden, M. *et al.* Global emissions pathways under different socioeconomic scenarios for use in CMIP6: A dataset of harmonized emissions trajectories through the end of the century. *Geoscientific Model Development* **12**, 1443–1475 (2019).
6. Hoesly, R. M. *et al.* Historical (1750–2014) anthropogenic emissions of reactive gases and aerosols from the Community Emissions Data System (CEDS). *Geoscientific Model Development* **11**, 369–408 (2018).
7. Wiedinmyer, C., Yokelson, R. J. & Gullett, B. K. Global Emissions of Trace Gases, Particulate Matter, and Hazardous Air Pollutants from Open Burning of Domestic Waste. *Environ. Sci. Technol.* **48**, 9523–9530 (2014).
8. Höglund-Isaksson, L., Gómez-Sanabria, A., Klimont, Z., Rafaj, P. & Schöpp, W. Technical potentials and costs for reducing global anthropogenic methane emissions in the 2050 timeframe—results from the GAINS model. *Environmental Research Communications* **2**, 025004 (2020).
9. O'Neill, B. C. *et al.* A new scenario framework for climate change research: the concept of shared socioeconomic pathways. *Climatic Change* **122**, 387–400 (2014).
10. O'Neill, B. C. *et al.* The roads ahead: Narratives for shared socioeconomic pathways describing world futures in the 21st century. *Global Environmental Change* **42**, 169–180 (2017).



11. Höglund-Isaksson, L. *Global anthropogenic methane emissions 2005–2030: technical mitigation potentials and costs*. (2012) doi:10.5194/acpd-12-11275-2012.
12. Hoornweg, D. & Bhada-Tata, P. *What a waste. A global review of solid waste management*. (2012).
13. Kaza, S., Bhada-Tata, P. & Van Woerden, F. *What a waste 2.0. A global snapshot of solid waste management to 2050*. (2018).
14. UNEP & ISWA. *Global Waste Management Outlook*. (2015).
15. SWEEPNET. Regional profile on the solid waste management situation in Middle East and North Africa. (2012).
16. Wilson, D. C., Rodic, L., Scheinberg, A., Velis, C. A. & Alabaster, G. Comparative analysis of solid waste management in 20 cities. *Waste Manag Res* **30**, 237–254 (2012).
17. Lebersorger, S. & Beigl, P. Municipal solid waste generation in municipalities: Quantifying impacts of household structure, commercial waste and domestic fuel. *Waste Management* **31**, 1907–1915 (2011).
18. EUROSTAT database. [Statistics | Eurostat \(europa.eu\)](#)
19. OECD database. [Waste - Municipal waste - OECD Data](#)
20. Chen, D. M.-C., Bodirsky, B. L., Krueger, T., Mishra, A. & Popp, A. The world's growing municipal solid waste: Trends and impacts. *Environmental Research Letters* (2020).
21. Hsiao, C. *Analysis of Panel Data*. (Cambridge University Press., 1986).
22. Scarlat, N., Motola, V., Dallemand, J. F., Monforti-Ferrario, F. & Mofor, L. Evaluation of energy potential of Municipal Solid Waste from African urban areas. *Renewable and Sustainable Energy Reviews* **50**, 1269–1286 (2015).
23. Zeng, C., Niu, D. & Zhao, Y. A comprehensive overview of rural solid waste management in China. *Frontiers of Environmental Science & Engineering* **9**, 949–961 (2015).
24. Grau, J., Terraza, H., Rodríguez, V., Rihm, A. & Sturzenegger, G. Solid waste management in Latin America and the Caribbean. (2015).

25. Ciuta, S., Apostol, T. & Rusu, V. Urban and Rural MSW Stream Characterization for Separate Collection Improvement. *Sustainability* **7**, 916–931 (2015).
26. Mihai, F.-C. *Rural waste generation : a geographical survey at local scale*. (2016).  
doi:10.31235/osf.io/z7xpj.
27. EDR. Economic Differences: Urban and Rural Areas. (2017).
28. Ismail, A. Towards greening the solid waste sector in the middle east and north africa region. (2012).
29. Feedback Infra Private Limited. *Detailed Project Report on Municipal Solid Waste Management for Visakhapatnam*. (2015).
30. Government of Tamil Nadu. *Data base on solid waste management in Tamil Nadu*. (2016).
31. Rajan, B., soorya, r, vincy, m & A.P., P. *Solid waste generation and associated problems of selected tourism destinations in Kerala - A comparative approach*. (2015).
32. Ravindra, K., Kaur, K. & Mor, S. System analysis of municipal solid waste management in Chandigarh and minimization practices for cleaner emissions. *Journal of Cleaner Production* **89**, 251–256 (2015).
33. Hiramatsu, A., Hara, Y., Sekiyama, M., Honda, R. & Chiemchaisri, C. Municipal solid waste flow and waste generation characteristics in an urban-rural fringe area in Thailand. *Waste management & research : the journal of the International Solid Wastes and Public Cleansing Association, ISWA* **27**, 951–60 (2009).
34. Lipinski, B. *et al*. Reducing food loss and waste. (2013).
